# Supplementary material
Source: bioRxiv or medRxiv preprint supplement (https://www.medrxiv.org/highwire/filestream/74484/field_highwire_adjunct_files/0/2020.03.22.20041277-1.pdf)
Supplement: Supplementary file [file 2020.03.22.20041277-1.pdf]

## **SUPPLEMENTARY APPENDIX**

|                                                |                 |
|------------------------------------------------|-----------------|
| <b><u>SUNRIZE INVESTIGATOR INFORMATION</u></b> | <b><u>2</u></b> |
| <b><u>METHOD</u></b>                           | <b><u>4</u></b> |
| <b><u>FIGURE S1 TIMELINE OF THE STUDY</u></b>  | <b><u>5</u></b> |
| <b><u>REFERENCE</u></b>                        | <b><u>5</u></b> |

## 1. SUNRIZE Investigator Information

- 1) Department of Critical Care Medicine (Yan Kang, Xuelian Liao, Bo Wang, Xiaodong Jin, Zhongwei Zhang, Xiaoqi Xie, Wanhong Yin, Chang Liu, Jie Yang, Yongming Tian, Huan Liu, Xiaojin Li, Jun Guo, Min He, Qin Wu, Jin Yang, Aiping Du, Meiling Dong, Jiangli Cheng, Aijia Ma, Luping Wang, Yue Zhou, Chengyong Ma, Xuwei Yang, Jianbo Li, Yan Zhang, Peng Wang, Wei Zhang, Xiangrong Song, Wenxi Xia, Baixu Chen); Department of Respiratory and Critical Care Medicine (Weimin Li, Jun Xiao); Department of Orthopedics (Rui Shi); Department of Clinical Research Management (Xia Zou); Department of Medical Affairs (Bingxing Shuai); Chinese Evidence-based Medicine Center and Cochrane China Center (Wen Wang); West China Hospital, Sichuan University, Chengdu
- 2) Department of Critical Care Medicine (Hong Chen, Qing Du), The Public Health Clinical Center of Chengdu, Chengdu
- 3) Clinical Research Center (Zhen li), Shanghai First Maternity and Infant Hospital, Tongji University School of Medicine, Shanghai
- 4) Department of Infectious Disease (Xiaocui Wu); Department of Critical Care Medicine (Jian Wang, Jin Tang); Guang'an people's hospital, Guang'an
- 5) Department of Infectious Disease and Critical Care Medicine (Rui Shi, Yi Xu, Kangjun Ren, Qi Wang); Department of Respiratory and Critical Care Medicine (Jun Xiao); Ganzi Hospital of West China Hospital, Ganzi Tibetan Autonomous Prefecture People's Hospital, Ganzi
- 6) Department of Critical Care Medicine (Xiangde Zhen, Wenlai Zhou, Chun Liu), Dazhou Central Hospital, Dazhou
- 7) Department of Critical Care Medicine (Maojuan Wang, Zhixuan Wu), People's Hospital of Deyang City, Deyang
- 8) Department of Critical Care Medicine (Xianying Lei, Huan Wang), Affiliated Luzhou Infectious Diseases Hospital of Southwest Medical University, Luzhou

- 9) Department of Critical Care Medicine (Hongtao Xia, Yu Gong, Xiaoyong Hu), Suining Central Hospital, Suining
- 10) Department of Critical Care Medicine (Sheng Lv, Hua Zhao), Panzhihua Central Hospital, Panzhihua
- 11) Department of Critical Care Medicine (Sheng Lv), People's Hospital of Yanyuan, Liangshan Yi Autonomous Prefecture, Liangshan
- 12) Department of Critical Care Medicine (Chao Jia, Jun Mo), Mianyang Central Hospital, Mianyang
- 13) Department of Critical Care Medicine (Li Chen, Li Zhang), Affiliated Hospital of North Sichuan Medical College, Nan Chong
- 14) Department of Critical Care Medicine (Juan Shang), Nanchong Central Hospital, Nanchong
- 15) Department of Critical Care Medicine (Min Yang, Mingxin Xu), People's hospital of ya'an, Ya'an
- 16) Pulmonary and Critical care medicine (Hailong Wei); Department of Infectious Disease (Jiameng Li); The People's Hospital of Leshan, Leshan
- 17) Department of Critical Care Medicine (Huaqiang Shen, Longwen Wang), Bazhong Central Hospital, Bazhong
- 18) Department of Critical Care Medicine (Xiong Yang), Langzhong People's Hospital, Langzhong
- 19) Department of Critical Care Medicine (Xianhua Xiao, Li Li), The Second People's Hospital of Neijiang, Neijiang
- 20) Department of Critical Care Medicine (Yuanjun Zhang, Lankai Liao), The first People's Hospital of Ziyang, Ziyang
- 21) Department of Critical Care Medicine (Chaogui Zhang, Guiqiang Jin), Yibin Second People's Hospital of Yibin, Yibin
- 22) Department of Critical Care Medicine (Minglin Deng, Yanping Li), The first people's hospital of Liangshan Yi Autonomous Prefecture, Xichang

## **2. Methods**

### **Data collection**

Clinical data recorded in the clinical report form (CRF) could be classified into four categories: 1) Demographic, epidemiological, clinical and laboratory data, severity scores on D1; 2) Summarization of microbiological, radiological findings, treatment drugs throughout the whole study period; 3) Daily data from D1 to the end of the study if the patient were still in the hospital during the study period, including vital signs, laboratory results, organ support measures, such as respiratory supporting method, ventilator settings, prone position, vasopressors, sedatives and nutritional support, etc.); 4) Outcome of the patient, including discharge, death, or the status on D28 if he was still hospitalized.

Data at eight o'clock in the morning were recorded if the parameters had continuous values during a day, such as vital signs, respiratory support method, vasopressors, etc., The first reported results was recoded if there's multiple laboratory results in one day for the same item.

### **Definition**

- 1) Acute respiratory distress syndrome (ARDS) was diagnosed according to the Berlin definition, the onset with 1 week of a known clinical insult or new or worsening respiratory symptoms, chest imaging with bilateral opacities, patient respiratory failure not fully explained via cardiac failure or fluid overload, and  $PaO_2/FiO_2 \leq 300 \text{ mmHg}$  with  $PEEP$  or  $CPAP \geq 5 \text{ cmH}_2\text{O}$  [E1].
- 2) Acute kidney injury (AKI) was defined as any of the followings, increase in serum

creatinine by  $\geq 26.5 \mu\text{mol/l}$  ( $0.3 \text{ mg/dl}$ ) within 48 hours, increase in serum creatinine  $\geq 1.5$  times than baseline or urine volume  $< 0.5 \text{ ml/kg/hour}$  for 6 hours [E2].

3) Septic shock was identified by sepsis patient requiring vasopressors to maintain  $\text{MAP} \geq 65 \text{ mm Hg}$ , and serum lactate level  $> 2 \text{ mmol/L}$  [E3].

### 3. Figure

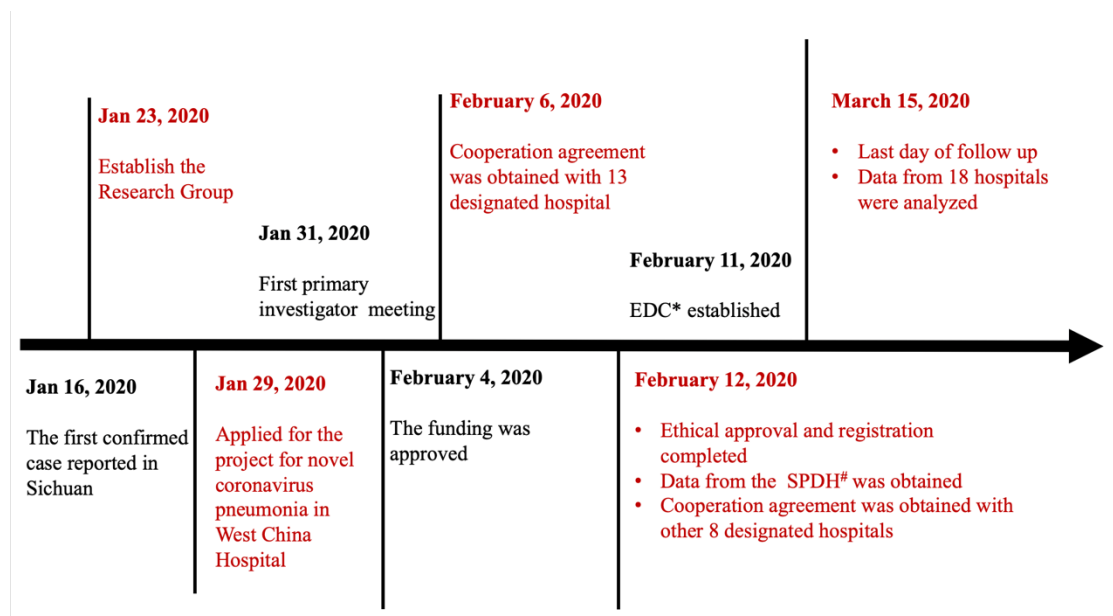

Figure S1 Timeline of the study

\*EDC: electronic data capture and analysis system

#SODH: Sichuan Provincial Department of Health

### 4. Reference

[E1] Force ADT, Ranieri VM, Rubenfeld GD, et al. Acute respiratory distress syndrome: the Berlin Definition. JAMA 2012; 307(23):2526-2533.

[E2] Kellum JA, Lameire N, Group KAGW. Diagnosis, evaluation, and management of acute kidney injury: a KDIGO summary (Part 1). Critical care (London, England)

2013;17(1):204-204.

[E3] Singer M, Deutschman CS, Seymour CW, et al. The Third International Consensus

Definitions for Sepsis and Septic Shock (Sepsis-3). JAMA 2016;315(8):801-810.
